# Supplementary material
Source: PubMed Central journal article supplement (PMC2732272)
Supplement: btn372_1.pdf [file btn372_1.pdf]

```

#####input argument#####
###x is a vector containing the expression intensities of a gene. The noncancer
samples
are listed before the cancer samples (or the group to be tested).
###nn is the sample size of the noncancer group.
###nc is the sample size of the cancer group.
###m0 is the low-end of the range of x to be tested.
###m1 is the up-end of the range of x to be tested.

#####output argument#####
###lrtsq is the likelihood ratio test statistic.
###pvalue is the p-value of the test.

getcp=function(x,nn,nc,m0,m1){

  xsort=c(x[1:nn], sort(x[(nn+1):(nn+nc)]))

  nqtest=nn+nc
  qaimidx=m0:m1

  sk=cumsum(xsort)[qaimidx]
  lrtsqi=(qaimidx*sum(xsort)/nqtest-sk)/(qaimidx*(1-qaimidx/nqtest))^0.5

  lrtsq=max(lrtsqi)

  if (lrtsq== -Inf) lrtsq==0

  if (lrtsq<=0){
    lrtsq=0;xqchangept=0; xqcprop=0;pvalue=1}

  if (lrtsq>0){

    xqcpidx=qaimidx[lrtsqi==lrtsq]
    xqcprop=(m1-xqcpidx+1)/nc
    b=lrtsq

    gamma=b/nqtest^0.5

    intf1=function(x){
      output=(1-x^2)^((nqtest-4)/2)
      return(output)
    }

    if (gamma<1){
      int1=integrate(intf1,lower=gamma,upper=1)$value

      intf2=function(x){
        xnew=x+b^2/(nqtest*(1-gamma^2)*x)
        nuxnew=exp(-0.583*xnew)
        output=1/x*nuxnew
        return(output)
      }

      lower2=b*((1/(qaimidx[length(qaimidx)])-1/nqtest)/(1-gamma^2))^0.5
      upper2=b*((1/(qaimidx[1])-1/nqtest)/(1-gamma^2))^0.5

      int2=integrate(intf2,lower=lower2,upper=upper2)$value

```

```
  pvalue=(nqtest/(2*pi))^0.5*int1+(2*pi)^(-0.5)*b*(1-b^2/nqtest)^((nqtest-  
4)/2)*int2  
}  
  
if (gamma>=1) pvalue=NA  
}  
  
return(list(lrtsq=lrtsq,pvalue=pvalue))  
}
```
